# Supplementary material for: Albumin and interferon-β fusion protein serves as an effective vaccine adjuvant to enhance antigen-specific CD8+ T cell-mediated antitumor immunity
Source: PubMed Central journal article supplement (PMC9036441; doi:10.1136/jitc-2021-004342), 2022-04-22
Supplement: jitc-2021-004342supp001.pdf [file jitc-2021-004342supp001.pdf]

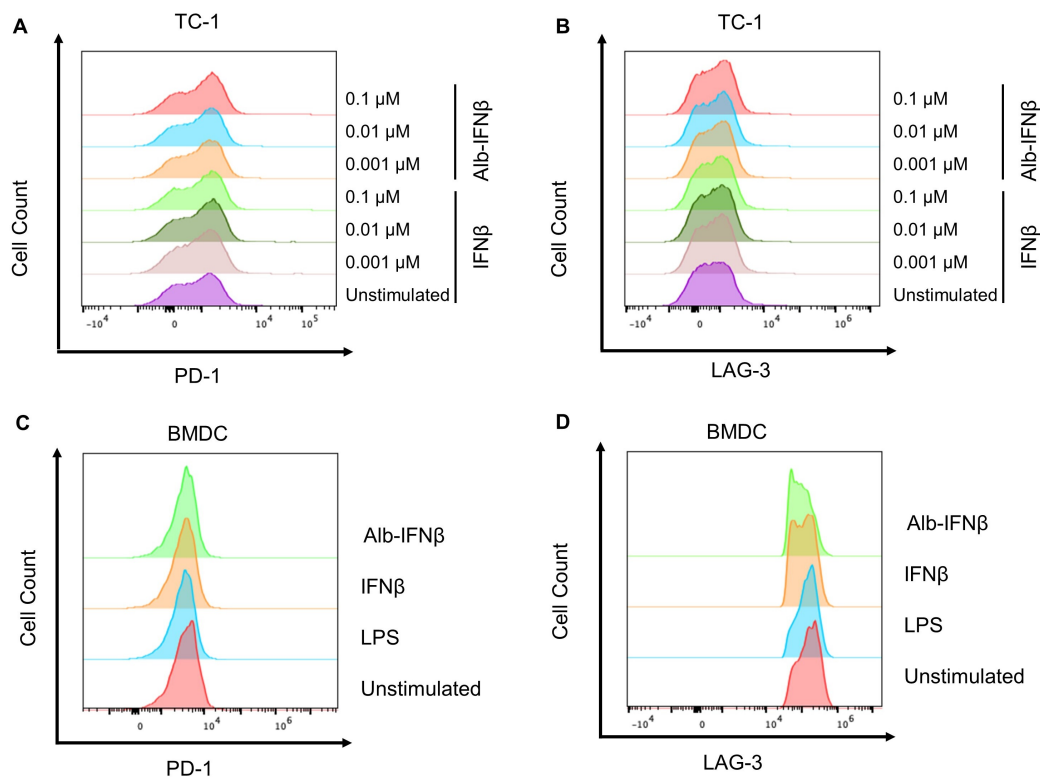

**Supplemental Figure 1**  
**Characterization of biological activity of Alb-IFN $\beta$  compared to IFN $\beta$  using TC-1 cells and BMDCs.** TC-1 cells were treated with 0.1  $\mu\text{M}$ , 0.01  $\mu\text{M}$ , or 0.001  $\mu\text{M}$  of either IFN $\beta$  or Alb-IFN $\beta$  for 24 hrs. The TC-1 cells were subsequently harvested and analyzed with flow cytometry for the expression of **(A)** PD-1 and **(B)** LAG-3 expression. BMDCs were treated with 0.1  $\mu\text{M}$  of either IFN $\beta$  or Alb-IFN $\beta$  for 24 hrs. BMDCs treated with lipopolysaccharide (LPS) as positive control. Shown here are representative flow cytometry images of **(C)** PD-1 and **(D)** LAG-3 expression.
