# Supplementary material for: Albumin and interferon-β fusion protein serves as an effective vaccine adjuvant to enhance antigen-specific CD8+ T cell-mediated antitumor immunity
Source: PubMed Central journal article supplement (PMC9036441; doi:10.1136/jitc-2021-004342), 2022-04-22
Supplement: jitc-2021-004342supp002.pdf [file jitc-2021-004342supp002.pdf]

## Supplemental Figure 2

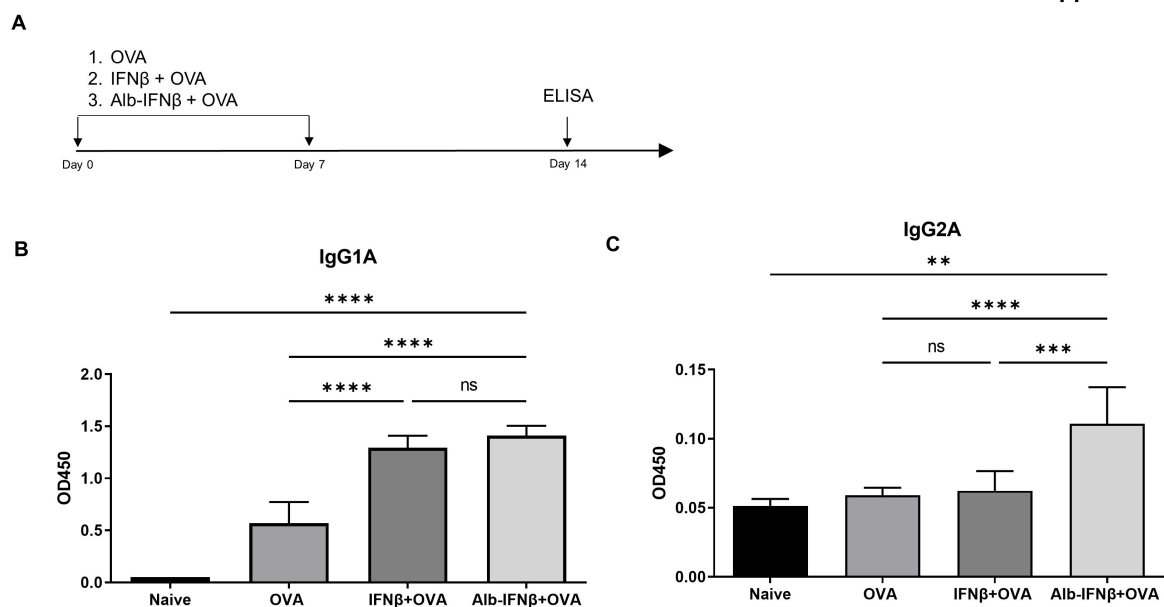**Supplemental Figure 2. Co-administration of Alb-IFN $\beta$  and OVA leads to enhanced OVA specific IgG2A antibody response.**

To detect mouse anti-OVA IgG1 or IgG2A antibodies in vaccinated mice, an ELISA assay was performed. Sera from vaccinated and untreated mice were collected on day 25. **(A)** Schematic illustration of the experiment (same as in **Figure 2**). Sera from naïve mice served as negative control. The sera were diluted 1000 $\times$  fold. **(B)** ELISA results of IgG1 antibodies. **(C)** ELISA results of IgG2A antibodies. \* $p$ <0.05, \*\* $p$ <0.01, \*\*\* $p$ <0.001, \*\*\*\* $p$ < 0.0001, ns not significant.
