# Supplementary material for: Albumin and interferon-β fusion protein serves as an effective vaccine adjuvant to enhance antigen-specific CD8+ T cell-mediated antitumor immunity
Source: HighWire-hosted journal article supplement (doi:10.1136/jitc-2021-004342), 2022-04-01
Supplement: jitc-2021-004342supp003_data_supplement.pdf [file jitc-2021-004342supp003_data_supplement.pdf]

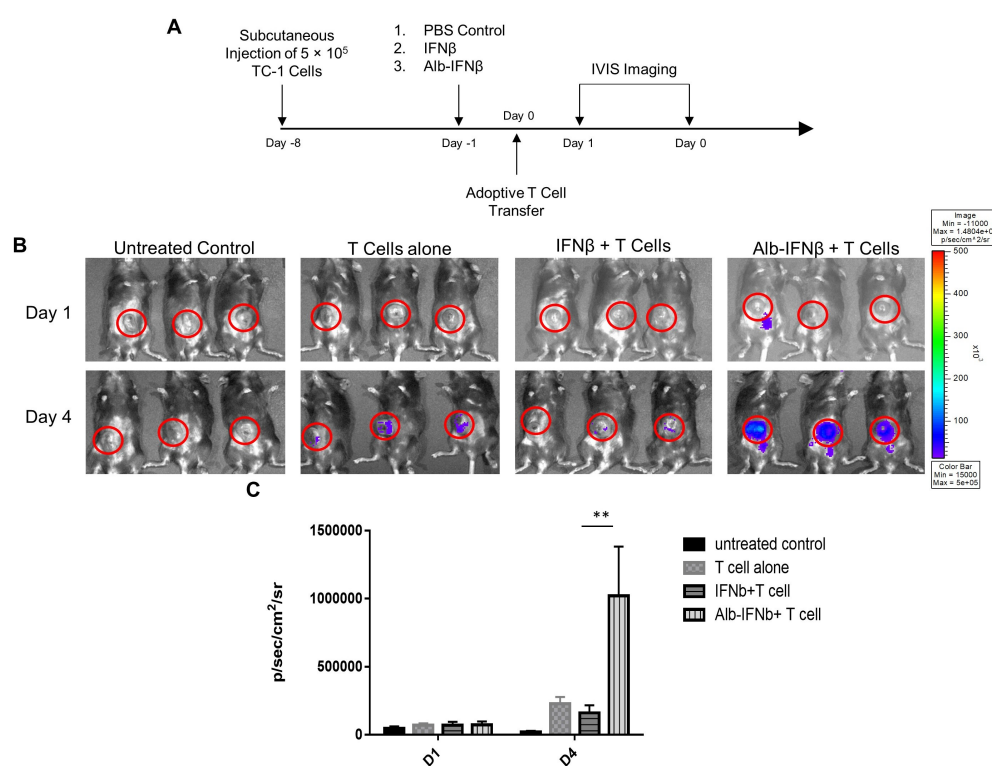

### Supplemental Figure 3 Characterization of E7-specific CD8+ T cell infiltration in tumors following injection with Alb-IFN $\beta$ . (A)

Schematic illustration of the experiment. Briefly, C57BL/6 mice (3 per group) were s.c. injected with  $5 \times 10^5$  TC-1 cells 8 days prior to the adoptive transfer of luciferase-expressing E7-specific T cells. Tumor-bearing mice were i.v. injected with either PBS, IFN $\beta$ , or Alb-IFN $\beta$  one day before T cell transfer. On day 0, mice were i.v. adoptive transferred E7-specific T cells in indicated groups, and imaged by IVIS spectrum on days 1 and 4 after T cell transfer. (B) IVIS imaging of the mice. Tumor regions are indicated by red circles. (C) Bar graph displaying the mean fluorescence signals showing T cell infiltration into the tumor regions.
