# Supplementary material for: Albumin and interferon-β fusion protein serves as an effective vaccine adjuvant to enhance antigen-specific CD8+ T cell-mediated antitumor immunity
Source: PubMed Central journal article supplement (PMC9036441; doi:10.1136/jitc-2021-004342), 2022-04-22
Supplement: jitc-2021-004342supp004.pdf [file jitc-2021-004342supp004.pdf]

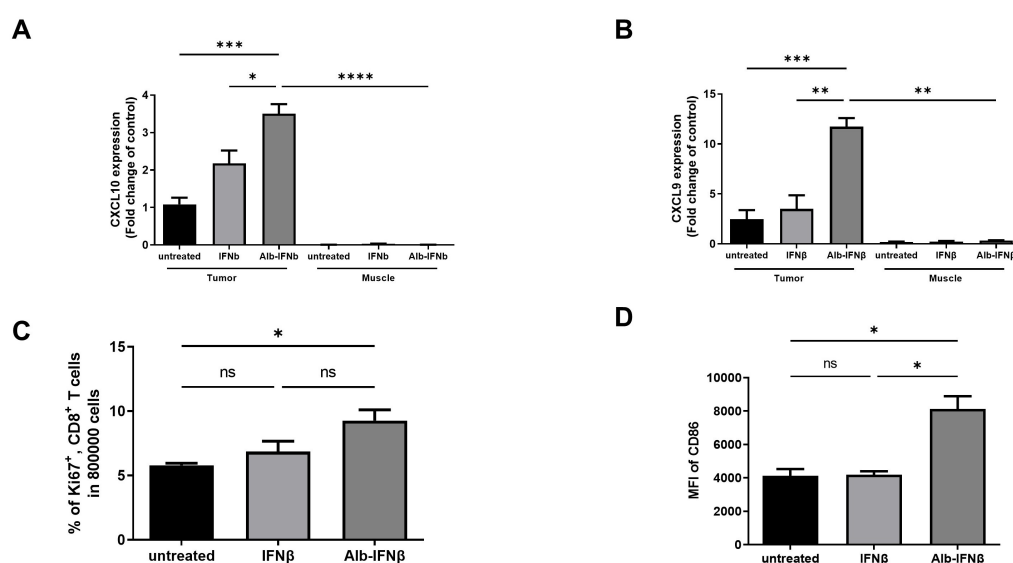

**Supplemental Figure 4 Characterization of chemokine levels in tumors and immune cell activity in tumor draining lymph nodes following injection with Alb-IFN $\beta$ .** Tumor-bearing mice ( $n = 3$ ) were i.v. injected with either PBS, IFN $\beta$ , or Alb-IFN $\beta$ . Three days after injection, tumors and tdLNs were harvested for quantitative real-time PCR (qRT-PCR) or flow cytometric analyses. **(A)** qRT-PCR data of CXCL10 expression in tumors. **(B)** qRT-PCR data of CXCL9 expression in tumors. **(C-E)** Cells were isolated from tdLNs and stained for proliferative CD8<sup>+</sup> T cells, or DC activation. **(C)** Bar graph summary of percentage of proliferative CD8<sup>+</sup> T cells in tdLNs. **(D)** Bar graph summary of mean fluorescence intensity of CD86 in CD11c<sup>+</sup> and I-A<sup>+</sup>/I-E<sup>+</sup> DCs. \* $p < 0.05$ , \*\* $p < 0.01$ , \*\*\* $p < 0.001$ , \*\*\*\* $p < 0.0001$ , ns not significant.
